# Supplementary material
Source: PubMed Central journal article supplement (PMC3435170)
Supplement: 1207728109_pnas.1207728109_SI.pdf [file 1207728109_pnas.1207728109_SI.pdf]

# Supporting Information

Frohlich 10.1073/pnas.1207728109

## SI Text

This file includes a table of earthquake epicenters located in this investigation, a comparison of these epicenters to those reported by the Array Network Facility (ANF), and figures showing monthly injection rates at all injection wells within 5 km of these located epicenters not already presented in Fig. 3.

**Epicenters Located in This Investigation. Comparison with epicenters reported by the ANF.** The ANF is the organization tasked with managing data transmission, archival, and quality control for USArray seismograph stations. As part of this effort their analysts identify phase arrivals at USArray stations and use these to produce a catalog of epicenters. Although the ANF catalog is not as user-friendly or as widely used as the National Earthquake Information Center (NEIC) catalog, it is of interest here because, unlike NEIC's locations, the ANF locations routinely include arrivals from USArray stations. During the study period, the ANF reported 120 epicenters occurring in the region mapped in Fig. 1.

Whereas only eight of the 67 earthquakes in Table S1 were reported by the NEIC, 22 are in the ANF catalog. Thus, the present investigation found 45 earthquakes not identified by the ANF. All but one of these 22 ANF epicenters were within 7 km of corresponding epicenters reported in Table S1, with a median difference of 4.2 km. In addition, 97 of the ANF epicenters originated from sites this study identified as quarries; these epicenters produced signals with prominent surface waves (Fig. S1), and origin times never occurring on nights or weekends. The sole remaining ANF epicenter not among the 67 determined in this investigation occurred at 1924 h on May 26, 2010. My analysis identified this event and attempted to determine a location, but concluded the available phase arrivals were too weak to determine a reliable location.

**Monthly Injection Rates at Wells Within 5 km of Earthquakes.** Detailed monthly injection rates are given in Figs. S2 and S3.

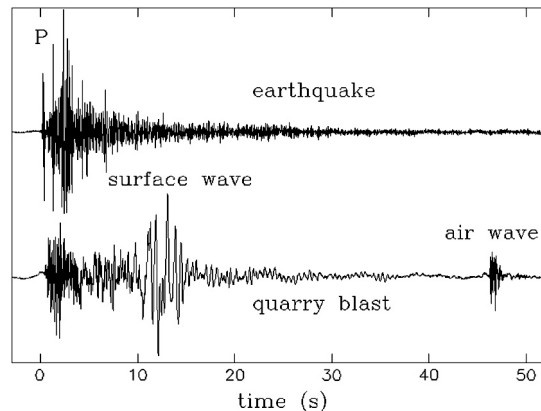

**Fig. S1.** Vertical-component seismograms for an earthquake (*Top*) and a quarry blast (*Bottom*) located in Wise County, each approximately 15 km from USArray station Z34 (Fig. 1). Note the prominent surface wave and visible air wave for the quarry blast, and the impulsive P-wave signal for the earthquake. This quarry blast and this earthquake occurred at 2131 h Universal Time (UT) on December 1, 2009 and 1031 h UT on July 30, 2010, respectively.
